# Supplementary material for: Recent zoonotic spillover and tropism shift of a Canine Coronavirus is associated with relaxed selection and putative loss of function in NTD subdomain of spike protein
Source: bioRxiv or medRxiv preprint supplement (doi:10.1101/2021.11.15.468709), 2021-11-17
Supplement: Supplementary file [file media-1.pdf]

# Table S1: Isolate details and sequence accessions for the included CoVs.

| Alignment set | Accession number | Alpha-1 Type   | Strain Name                | Collection date | Location         |
|---------------|------------------|----------------|----------------------------|-----------------|------------------|
| 1 & 2         | MW591993.1       | CCoV-HuPN-2018 | CCoV-HuPN-2018             | 2017            | Malaysia         |
| 1 & 2         | EU856361.1       | CCoV2b         | 341/05                     | Dec 2005        | Italy            |
| 1 & 2         | EU924791.1       | CCoV2b         | 119-08                     | Mar 2008        | Italy            |
| 1 & 2         | HQ450377.1       | CCoV2b         | 68-09                      | 2009            | Greece           |
| 1 & 2         | HQ450376.1       | CCoV2b         | 66-09                      | 2009            | Greece           |
| 1 & 2         | EU924790.1       | CCoV2b         | 430-07                     | Oct 2007        | Italy            |
| 1 & 2         | EU856362.1       | CCoV2b         | 174-06                     | Mar 2006        | Italy            |
| 1 & 2         | MT906865.1       | CCoV2b         | 2020-7                     | 2020            | United Kingdom   |
| 1 & 2         | GQ477367.1       | CCoV2b         | CCOV-NTU336-2008           | Nov 2008        | Taiwan           |
| 1 & 2         | LC190907.1       | CCoV2b         | CCOV-Dog-HCM47-2015        | June 2015       | Vietnam          |
| 1 & 2         | KX900401.1       | TGEV           | TGEV/USA/Tennessee144/2008 | 15 Apr 2008     | USA - Tennessee  |
| 1 & 2         | KC609371.1       | TGEV           | NA                         | 21 May 2013     | China            |
| 1 & 2         | FJ755618.2       | TGEV           | H16                        | 1973            | China            |
| 1 & 2         | KT696544.1       | TGEV           | JS2012                     | 2012            | China            |
| 1 & 2         | EU074218.2       | TGEV           | Attenuated H               | NA              | China            |
| 1 & 2         | X53128.1         | TGEV           | TGEV FD772-70              | NA              | China            |
| 1 & 2         | KX499468.1       | TGEV           | TGEV AHHF                  | 22 Dec 2015     | China            |
| 1 & 2         | KC962433.1       | TGEV           | TGEV HX                    | 5 May 2012      | China            |
| 1 & 2         | JQ693050.1       | TGEV           | NA                         | NA              | South Korea      |
| 1 & 2         | KX083668.1       | TGEV           | NA                         | 2015            | China            |
| 2             | AB781789.1       | FCOV2          | KUK-H-L                    | NA              | Japan            |
| 2             | AB781788.1       | FCOV2          | M91-267                    | NA              | Japan            |
| 2             | AB907624.1       | FCOV2          | Tokyo/cat/130627           | NA              | Tokyo, Japan     |
| 2             | JN634064.1       | FCOV2          | WSU-79-1683                | 1979            | USA - Washington |

# Figure S1

1.

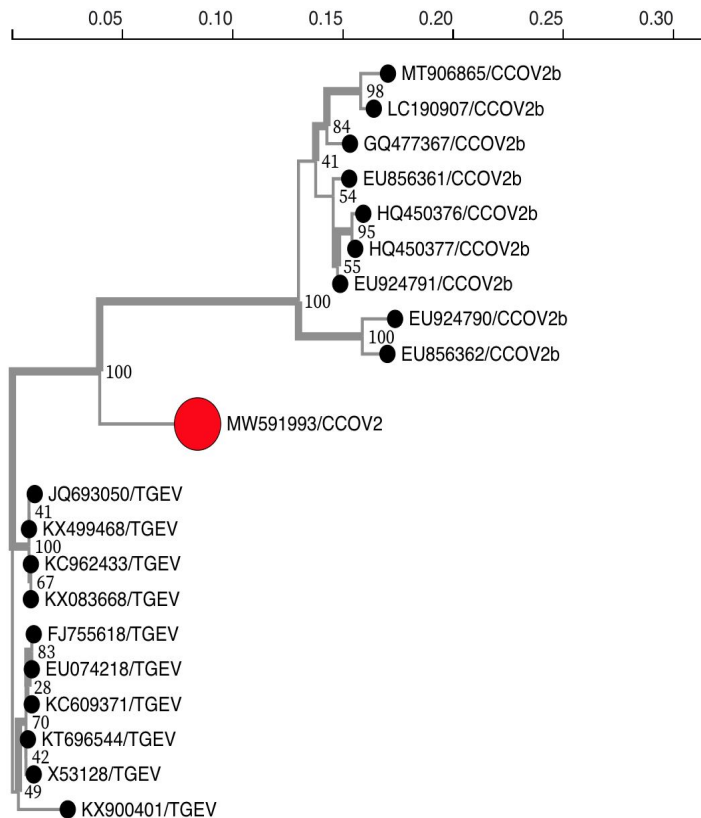

2.

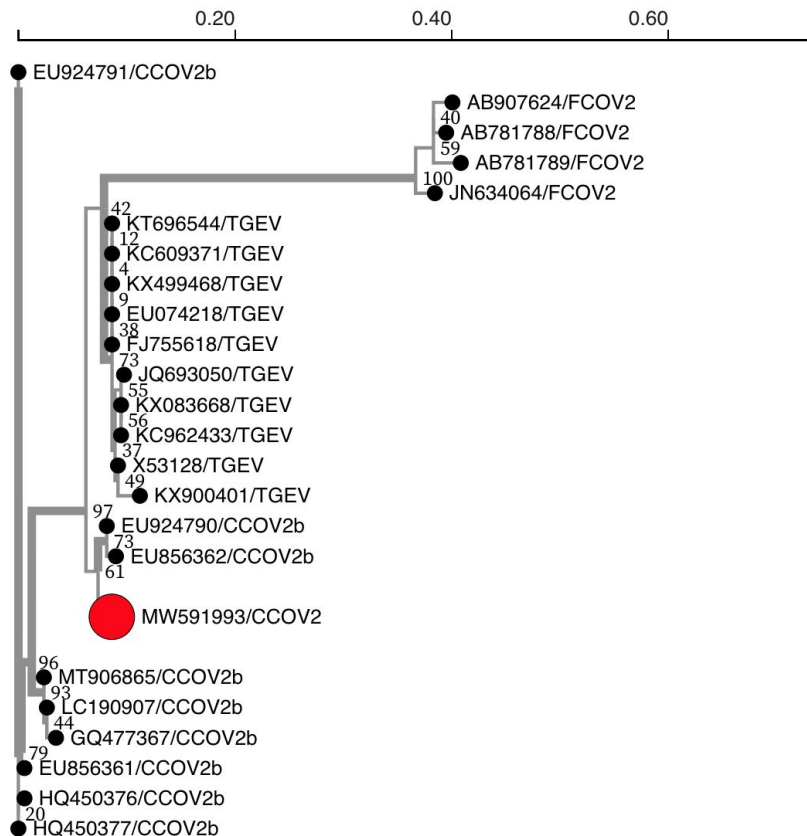

3.

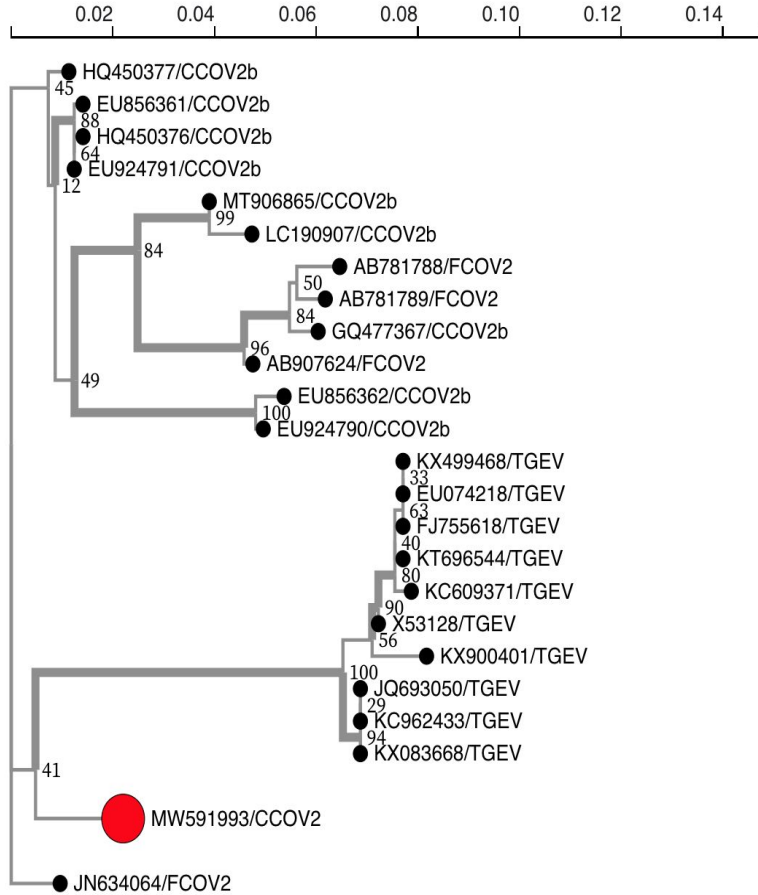

4.

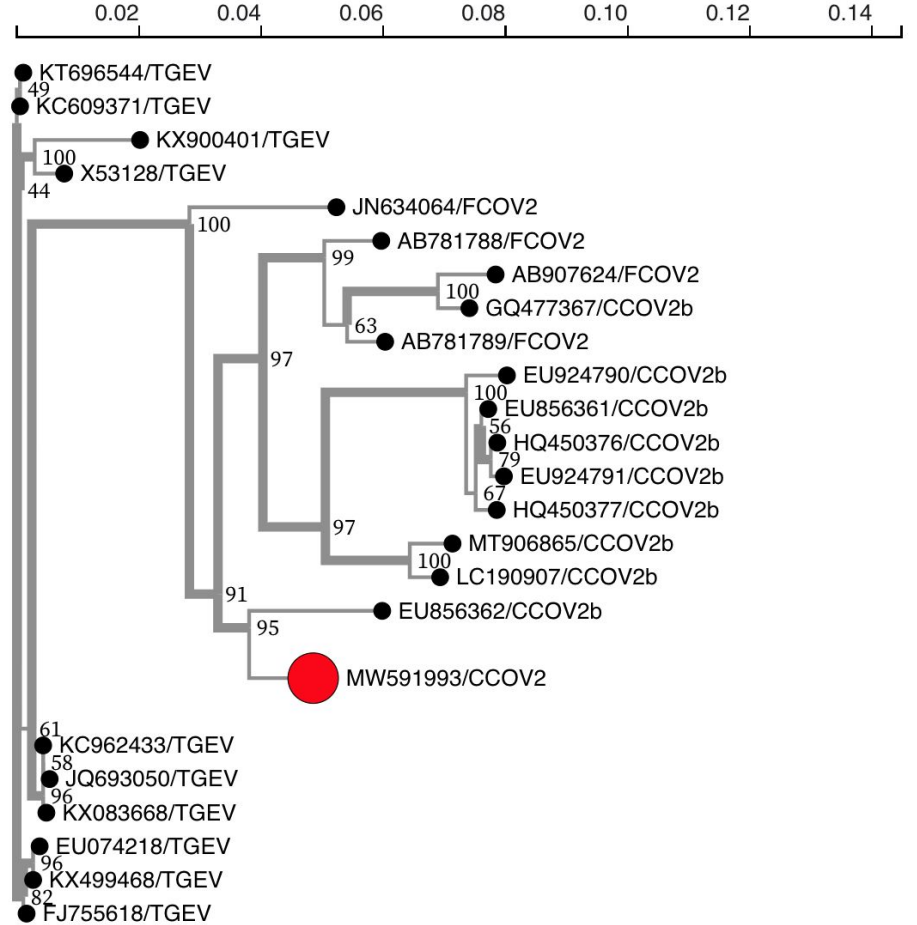

5.

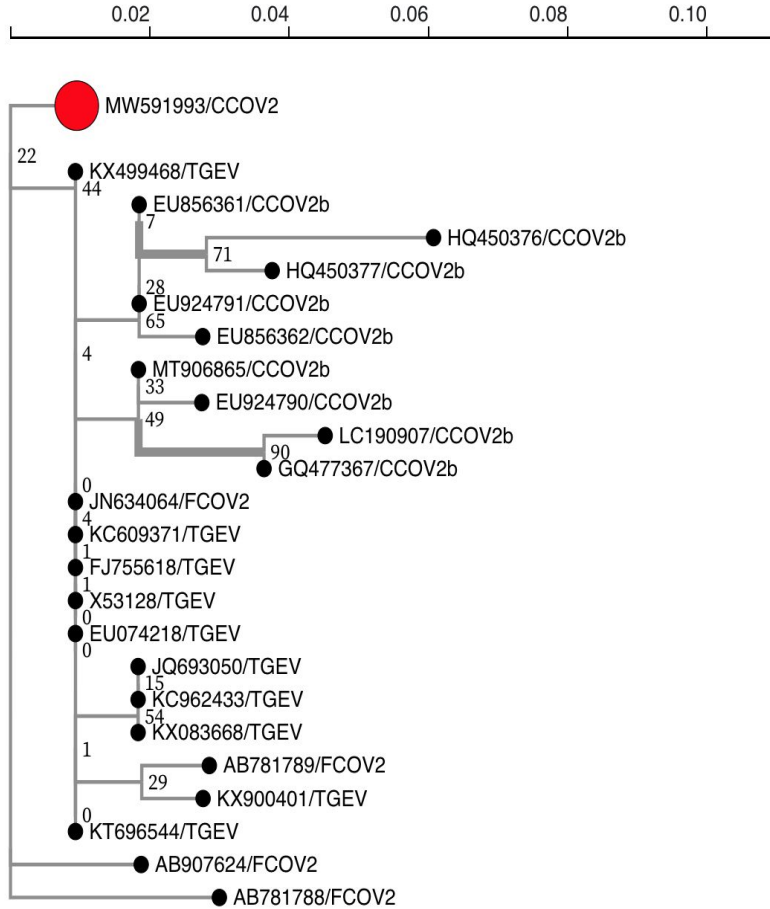

6.

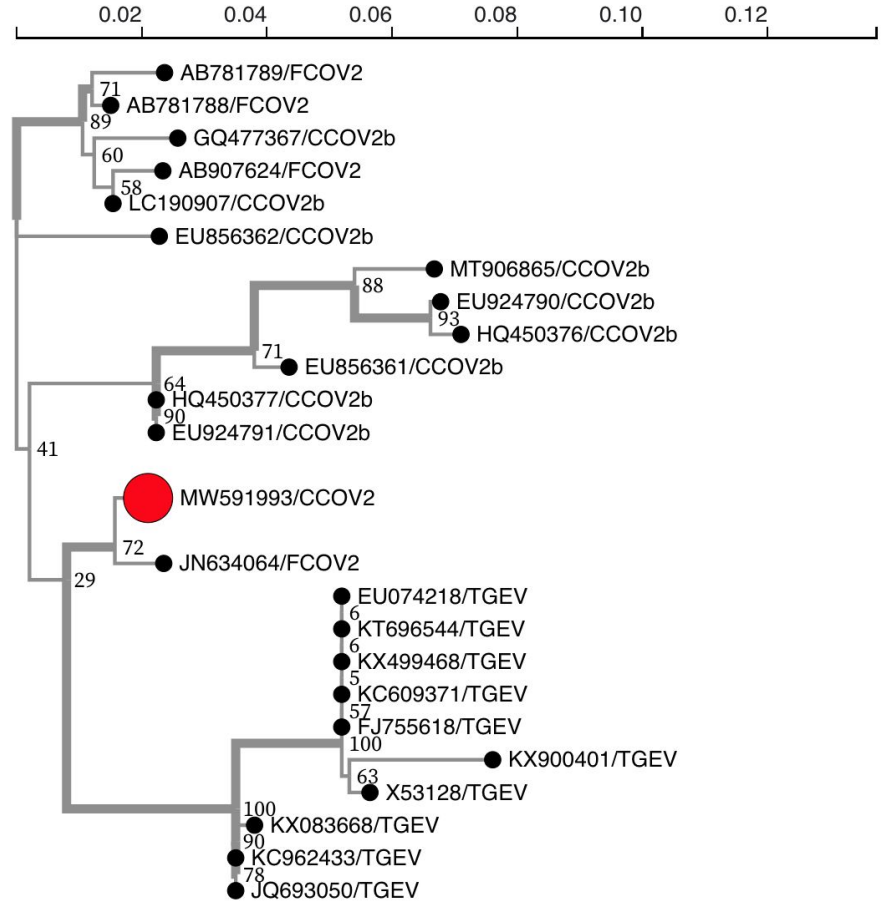

7.

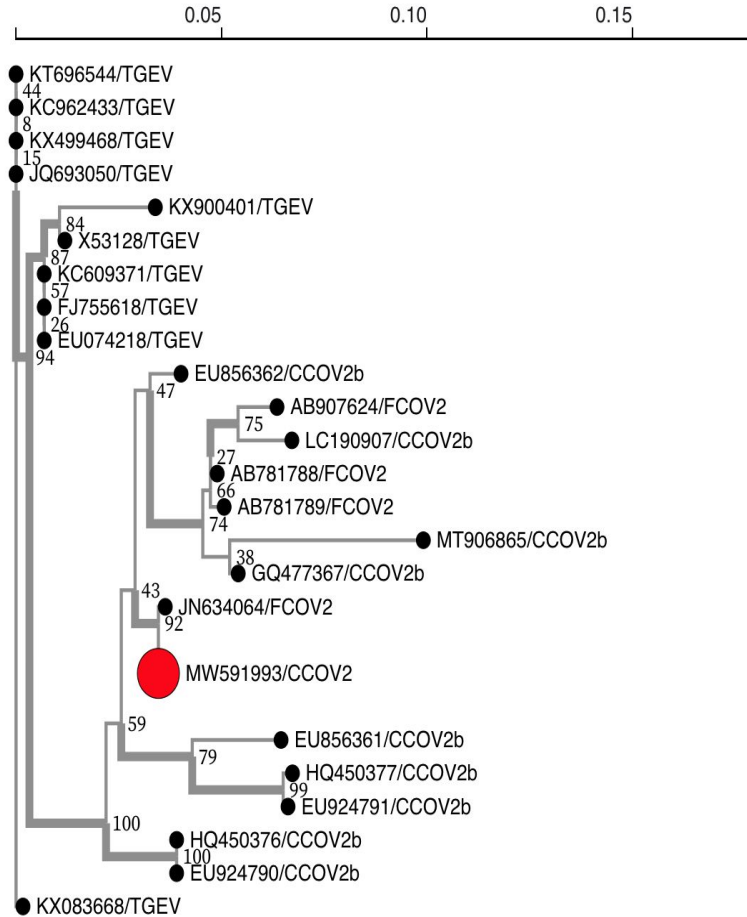

8.

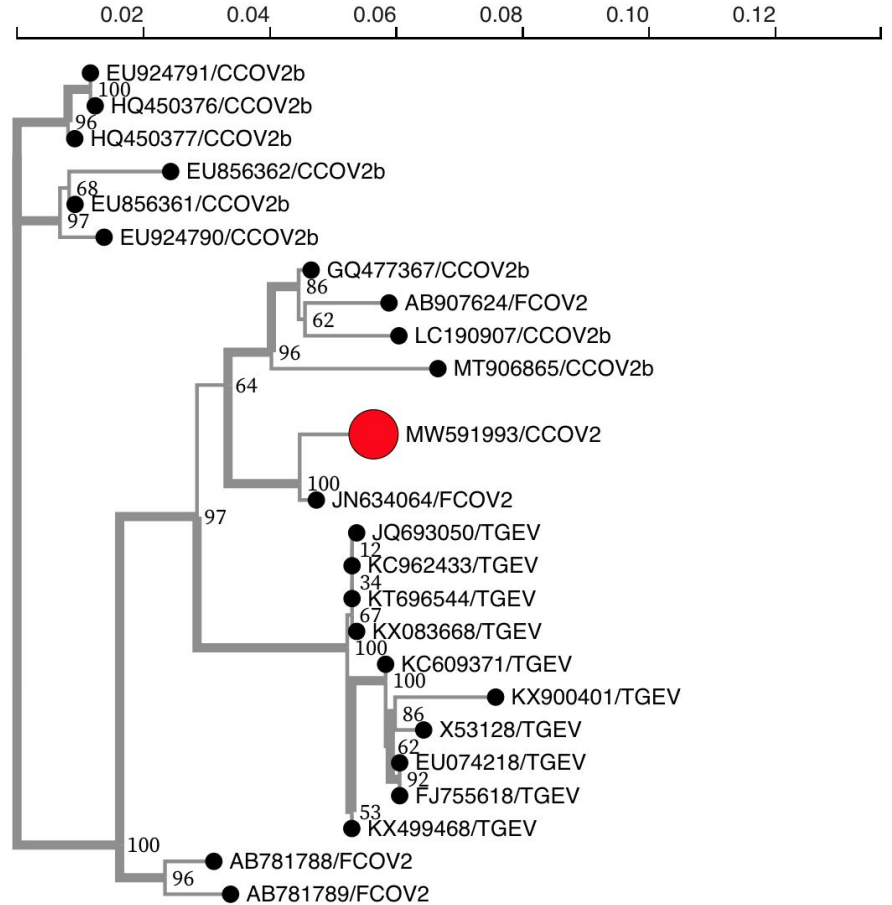

9.

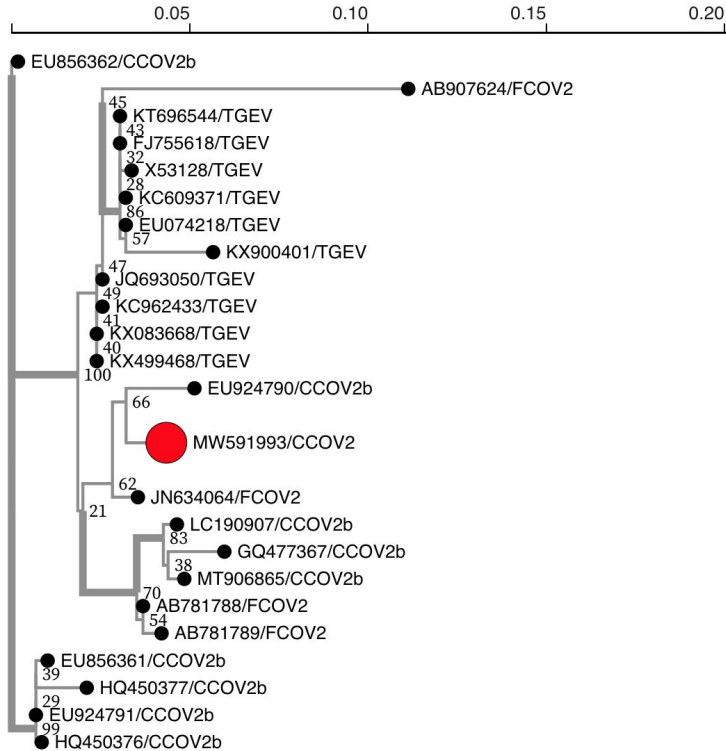

**Figure S1.** Phylogenetic trees for each GARD fragment inferred using RaxML. 1. Is the first non-recombinant fragment from alignment set I and the further trees correspond to non-recombinant fragments from alignment set II. Tree 2 corresponds to non-recombinant fragment 2 as depicted in the Fig. 1 gene map; tree 3 corresponds to non-recombinant fragment 3, and so on. These trees represent the phylogenetic incongruencies between the different non-recombinant fragments.

# Table S2: Positive selection statistics from MEME and FEL

| HuPN-2018 sites | FIPV mapped sites | MEME Non-synonymous substitution rate | MEME Synonymous substitution rate | FEL Non-synonymous substitution rate | FEL Synonymous substitution rate | MEME p-value | FEL p-value |
|-----------------|-------------------|---------------------------------------|-----------------------------------|--------------------------------------|----------------------------------|--------------|-------------|
| 13              | 13                | 3.58                                  | 0                                 | NA                                   | NA                               | 0.04         | NA          |
| 110             | 130               | 30.94                                 | 0                                 | 29.432                               | 0                                | 0.02         | 0.02        |
| 124             | 144               | 3.87                                  | 0                                 | NA                                   | NA                               | 0.02         | NA          |
| 246             | 262               | 2.9                                   | 0                                 | 2.784                                | 0                                | 0.02         | 0.04        |
| 367             | 384               | 4.8                                   | 0                                 | 4.817                                | 0                                | 0.04         | 0.05        |
| 575             | 603               | 11.17                                 | 0                                 | NA                                   | NA                               | 0.02         | NA          |
| 529             | 549               | 9.23                                  | 0                                 | 9.46                                 | 0                                | NA           | 0.05        |
| 608             | 715               | 11.26                                 | 0                                 | NA                                   | NA                               | 0.05         | NA          |
| 619             | 637               | 12.48                                 | 0                                 | 12.47                                | 0                                | 0.03         | 0.02        |
| 589             | 619               | 10.84                                 | 0                                 | NA                                   | NA                               | 0.04         | NA          |
| 1227            | 1246              | 27.49                                 | 0                                 | NA                                   | NA                               | 0.04         | NA          |
| 1296            | 1311              | 38.37                                 | 0                                 | 37.386                               | 0                                | 0.01         | 0.01        |
| 1233            | 1252              | 3.3                                   | 0                                 | 3.281                                | 0                                | 0.04         | 0.04        |

# Figure S2

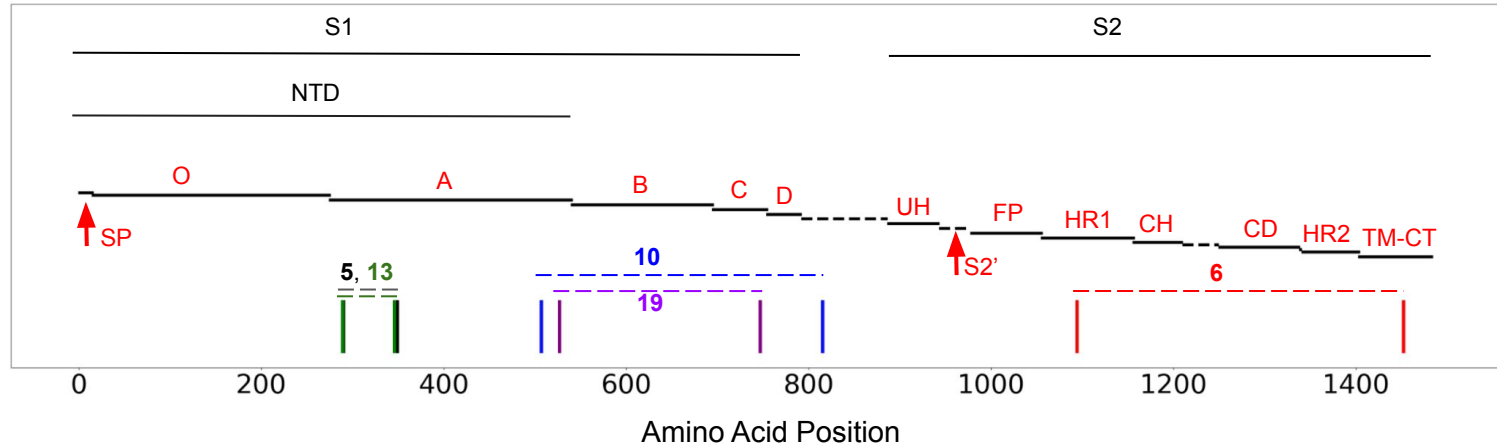

**Figure S2.** RDP5 results with supported recombination events (event boundaries outlined) that implicate CCoV-HuPn-2018, positioned along a spike gene map. A complete, enumerated list of the RDP5 recombination events, involving all sequences, can be found in Table S3. Event 5 (black) involves a proposed FCoV2 recombinant, with genetic donors: CCoV-HuPn-2018 and a different FCoV2. Event 13 (green) extensively overlaps with 5, as well as with GARD fragment 2 (Fig. 1), where CCoV-HuPn-2018 is a proposed recombinant, with genetic donors: FCoV2 from event 13, as well as a TGEV. Event 10 (cyan) proposes the same FCoV2 sequence from 5 and 13 as the recombinant, with genetic donors: CCoV-HuPn-2018 and a TGEV. Event 19 (purple) falls within 10, with CCoV-HuPn-2018 as the proposed recombinant and the genetic donors: a CCoV2b and a TGEV. Event 6 (red) proposes a CCoV2b as the recombinant, with genetic donors: CCoV-HuPn-2018 and another CCoV2b.



# Table S3: RDP5 Recombination Results

| <p>⚠ It is possible that this apparent recombination signal could have been caused by an evolutionary process other than recombination.</p> <p>⚠ The additional recombination junction in combination of was most likely either compensated by a subsequent recombination event or off the edge of the analyzed sequence fragments.</p> <p>⚠ The recombination assessment may have been misclassified (one of the identified parents might be the recombinant).</p> <p>Major Parent = Parent contributing the major fraction of sequence.</p> <p>Minor Parent = Parent contributing the minor fraction of sequence.</p> <p>Unknown = Only one parent and a recombination event led to the alignment for a recombination event to be detected. The sequence listed as a reference was used to fix the confidence of a missing parental sequence.</p> <p>NS = No significant P-value was recorded for this recombination event using the particular method in question.</p> |             | <p>Recombination Event Number</p> |       | <p>Dissemination Probability</p> |       | <p>In Recombination Sequence</p> |       | <p>Reference to recombination junction</p> |       |
|---------------------------------------------------------------------------------------------------------------------------------------------------------------------------------------------------------------------------------------------------------------------------------------------------------------------------------------------------------------------------------------------------------------------------------------------------------------------------------------------------------------------------------------------------------------------------------------------------------------------------------------------------------------------------------------------------------------------------------------------------------------------------------------------------------------------------------------------------------------------------------------------------------------------------------------------------------------------------|-------------|-----------------------------------|-------|----------------------------------|-------|----------------------------------|-------|--------------------------------------------|-------|
| Location ID                                                                                                                                                                                                                                                                                                                                                                                                                                                                                                                                                                                                                                                                                                                                                                                                                                                                                                                                                               | Parent File | Major                             | Minor | Major                            | Minor | Major                            | Minor | Major                                      | Minor |
| 1                                                                                                                                                                                                                                                                                                                                                                                                                                                                                                                                                                                                                                                                                                                                                                                                                                                                                                                                                                         | 1           | 1791                              | 2366  | 1791                             | 2366  | 933                              |       | 1805                                       | 1805  |
| 2                                                                                                                                                                                                                                                                                                                                                                                                                                                                                                                                                                                                                                                                                                                                                                                                                                                                                                                                                                         | 2           | 0                                 | 0     | 0                                | 0     | 0                                | 0     | 0                                          | 0     |
| 3                                                                                                                                                                                                                                                                                                                                                                                                                                                                                                                                                                                                                                                                                                                                                                                                                                                                                                                                                                         | 3           | 0                                 | 0     | 0                                | 0     | 0                                | 0     | 0                                          | 0     |
| 4                                                                                                                                                                                                                                                                                                                                                                                                                                                                                                                                                                                                                                                                                                                                                                                                                                                                                                                                                                         | 4           | 1474                              | 3198  | 1474                             | 3198  | 1474                             | 3198  | 1474                                       | 3198  |
| 5                                                                                                                                                                                                                                                                                                                                                                                                                                                                                                                                                                                                                                                                                                                                                                                                                                                                                                                                                                         | 5           | 580                               | 1590  | 580                              | 1590  | 680                              |       | 1590                                       | 1590  |
| 6                                                                                                                                                                                                                                                                                                                                                                                                                                                                                                                                                                                                                                                                                                                                                                                                                                                                                                                                                                         | 6           | 0                                 | 0     | 0                                | 0     | 0                                | 0     | 0                                          | 0     |
| 7                                                                                                                                                                                                                                                                                                                                                                                                                                                                                                                                                                                                                                                                                                                                                                                                                                                                                                                                                                         | 7           | 2420                              | 3007  | 2420                             | 3007  | 2420                             | 3007  | 2420                                       | 3007  |
| 8                                                                                                                                                                                                                                                                                                                                                                                                                                                                                                                                                                                                                                                                                                                                                                                                                                                                                                                                                                         | 8           | 3038                              | 400   | 3038                             | 400   | 3038                             | 400   | 3038                                       | 400   |
| 9                                                                                                                                                                                                                                                                                                                                                                                                                                                                                                                                                                                                                                                                                                                                                                                                                                                                                                                                                                         | 9           | 3380                              | 3380  | 3380                             | 3380  | 3380                             | 3380  | 3380                                       | 3380  |
| 10                                                                                                                                                                                                                                                                                                                                                                                                                                                                                                                                                                                                                                                                                                                                                                                                                                                                                                                                                                        | 10          | 860                               | 1540  | 860                              | 1540  | 860                              | 1540  | 860                                        | 1540  |
| 11                                                                                                                                                                                                                                                                                                                                                                                                                                                                                                                                                                                                                                                                                                                                                                                                                                                                                                                                                                        | 11          | 31                                | 240   | 31                               | 240   | 31                               | 240   | 31                                         | 240   |
| 12                                                                                                                                                                                                                                                                                                                                                                                                                                                                                                                                                                                                                                                                                                                                                                                                                                                                                                                                                                        | 12          | 21                                | 1797  | 21                               | 1797  | 21                               | 1797  | 21                                         | 1797  |
| 13                                                                                                                                                                                                                                                                                                                                                                                                                                                                                                                                                                                                                                                                                                                                                                                                                                                                                                                                                                        | 13          | 8                                 | 184   | 8                                | 184   | 8                                | 184   | 8                                          | 184   |
| 14                                                                                                                                                                                                                                                                                                                                                                                                                                                                                                                                                                                                                                                                                                                                                                                                                                                                                                                                                                        | 14          | 2040                              | 2040  | 2040                             | 2040  | 2040                             | 2040  | 2040                                       | 2040  |
| 15                                                                                                                                                                                                                                                                                                                                                                                                                                                                                                                                                                                                                                                                                                                                                                                                                                                                                                                                                                        | 15          | 2874                              | 3007  | 2874                             | 3007  | 2874                             | 3007  | 2874                                       | 3007  |
| 16                                                                                                                                                                                                                                                                                                                                                                                                                                                                                                                                                                                                                                                                                                                                                                                                                                                                                                                                                                        | 16          | 2480                              | 2874  | 2480                             | 2874  | 2480                             | 2874  | 2480                                       | 2874  |
| 17                                                                                                                                                                                                                                                                                                                                                                                                                                                                                                                                                                                                                                                                                                                                                                                                                                                                                                                                                                        | 17          | 212                               | 212   | 212                              | 212   | 212                              | 212   | 212                                        | 212   |
| 18                                                                                                                                                                                                                                                                                                                                                                                                                                                                                                                                                                                                                                                                                                                                                                                                                                                                                                                                                                        | 18          | 200                               | 400   | 200                              | 400   | 200                              | 400   | 200                                        | 400   |
| 19                                                                                                                                                                                                                                                                                                                                                                                                                                                                                                                                                                                                                                                                                                                                                                                                                                                                                                                                                                        | 19          | 730                               | 1590  | 730                              | 1590  | 730                              | 1590  | 730                                        | 1590  |



# Figure S3

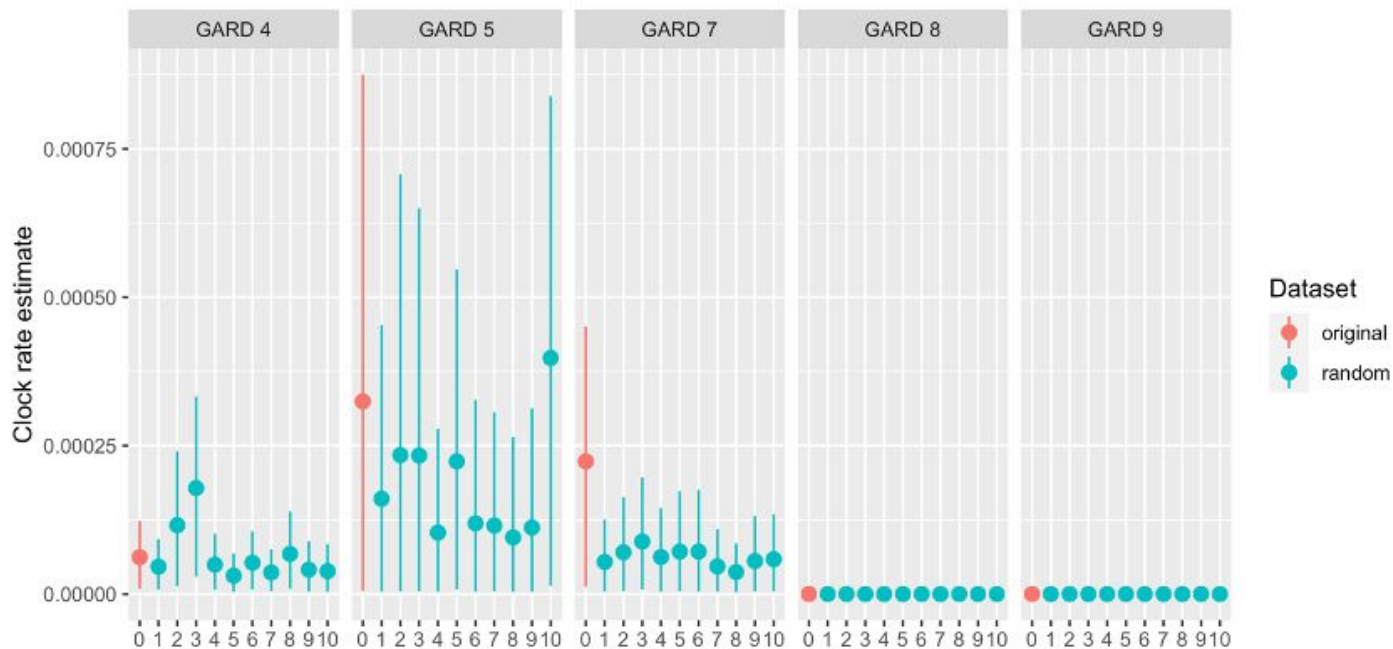

**Figure S3.** Mean and 95% HPD clock rate estimates for the original dataset and ten datasets with random dates are shown for the five GARD fragments with evidence of temporal signal on the root-tip regression analysis. Only GARD 7 had a mean clock rate estimate above the 95% HPD of the randomized datasets, indicating the presence of a temporal signal.

Table S4: Root-tip-regression results for each GARD Partition

| GARD partition | Correlation coefficient | R <sup>2</sup> |
|----------------|-------------------------|----------------|
| 1              | 0.083                   | 0.0070         |
| 2              | -0.046                  | 0.0021         |
| 3              | -0.11                   | 0.013          |
| 4              | 0.20                    | 0.040          |
| 5              | 0.20                    | 0.039          |
| 6              | 0.088                   | 0.0077         |
| 7              | 0.36                    | 0.13           |
| 8              | 0.30                    | 0.089          |
| 9              | 0.21                    | 0.046          |

# Figure S4

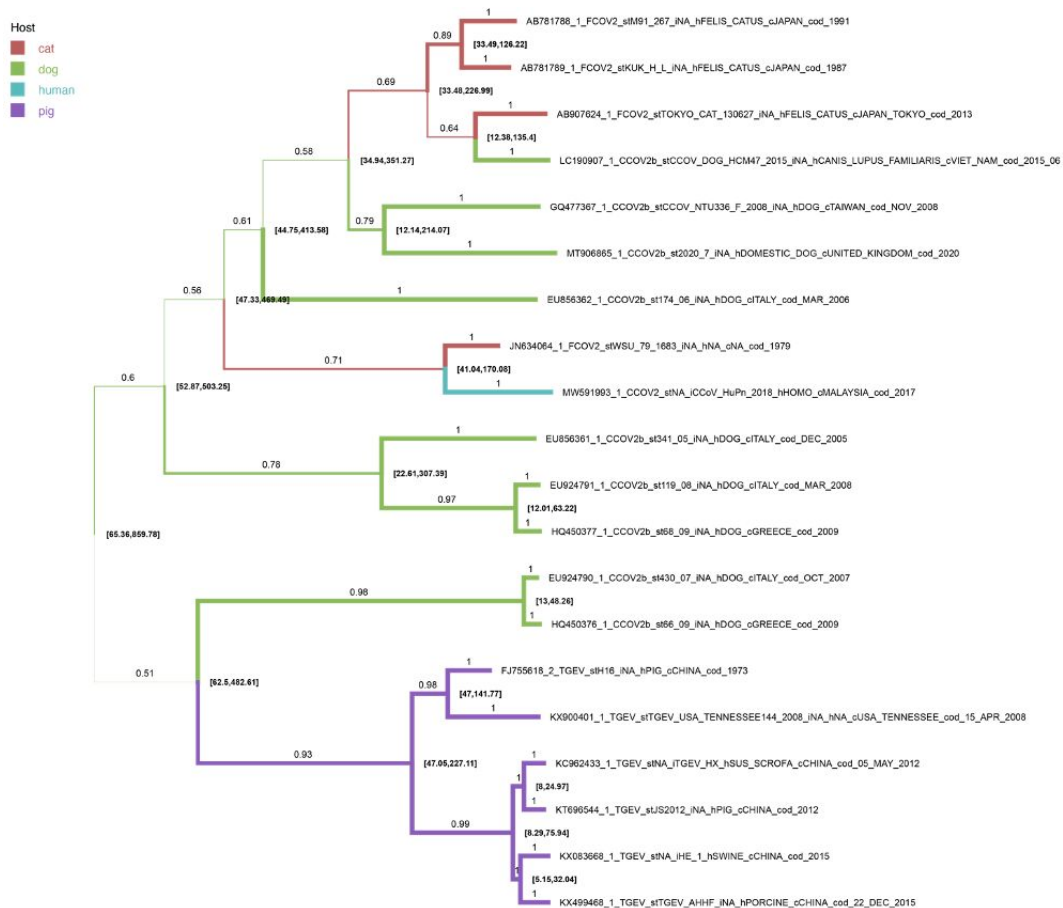

**Figure S4.** Ancestral host reconstruction and divergence time estimates. Branches are colored by inferred host species. The branch width is proportional to the posterior probability of host assignment (also labeled on branches). Internal nodes are labeled with the divergence time 95% HPD in years from the most recent sample date, 2017. CCoV-HuPn-2018 diverged from FCoV2 JN634064 between 40 and 170 years ago, with a median date estimate of 1957.

# Figure S5

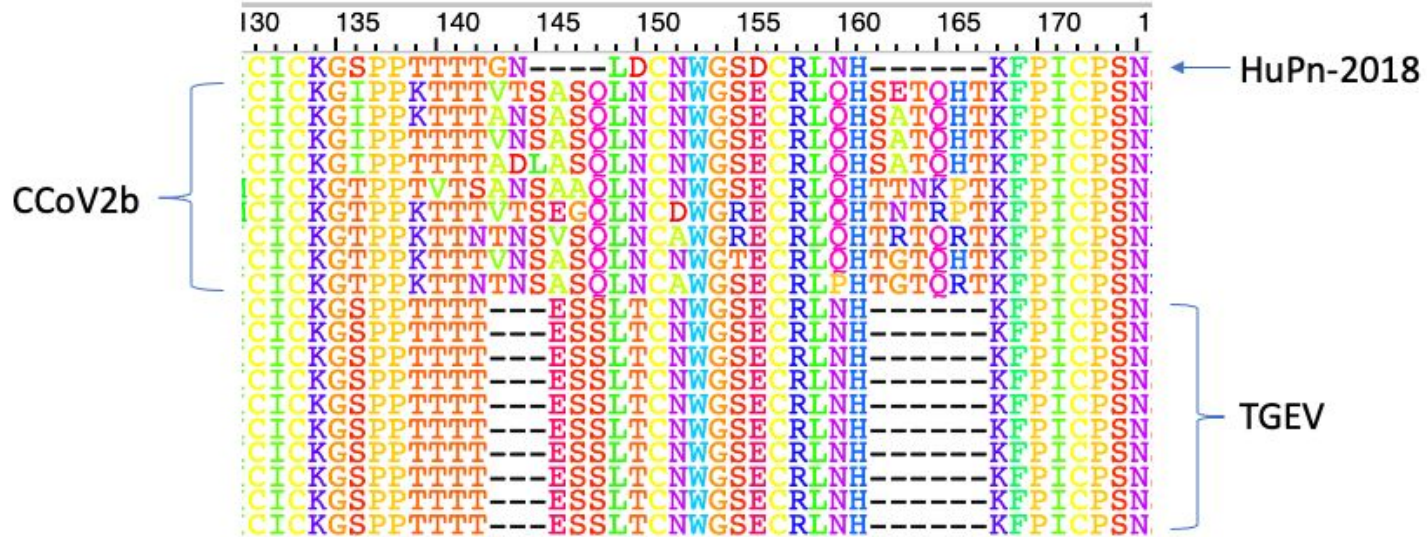

**Figure S5.** Set I sequence alignment highlighting the region involved in the proposed sialic acid binding, identified in the Krempf et al. (1997) mutation experiments.
